# Supplementary material for: Indexical and statistical approaches to investigate the integrated origins of elements in the sediment of Teesta River, Bangladesh: sediment quality and ecological risk assessment
Source: Royal Society of Chemistry journal article supplement (doi:10.1039/d2em00475e), 2023-01-01
Supplement: d2em00475e1.pdf [file d2em00475e1.pdf]

**Table S1:** Mathematical equations with the importance of Geo-environmental and ecological indices.

| Geo-environmental indices                   | Indices                              | Mathematical equations                                                                                                                                                               | Classifications                                                                                                                           | Contamination degree                                                                                                                                                                      | References                                                          |
|---------------------------------------------|--------------------------------------|--------------------------------------------------------------------------------------------------------------------------------------------------------------------------------------|-------------------------------------------------------------------------------------------------------------------------------------------|-------------------------------------------------------------------------------------------------------------------------------------------------------------------------------------------|---------------------------------------------------------------------|
| Geo-environmental indices                   | Geo-accumulation index ( $I_{geo}$ ) | $I_{geo} = \log_2 \left( \frac{C_n}{1.5 \times B_n} \right)$ Where, $C_n$ is the measured elemental concentration in sediment and $B_n$ is the background heavy metal concentrations | $I_{geo} < 0$                                                                                                                             | Practically uncontaminated                                                                                                                                                                | Müller (1979); Kumar et al. (2022); Kumar et al. (2021)             |
|                                             |                                      |                                                                                                                                                                                      | $0 \leq I_{geo} < 1$                                                                                                                      | Uncontaminated to moderately contaminated                                                                                                                                                 |                                                                     |
|                                             |                                      |                                                                                                                                                                                      | $1 \leq I_{geo} < 2$                                                                                                                      | Moderately contaminated                                                                                                                                                                   |                                                                     |
|                                             |                                      |                                                                                                                                                                                      | $2 \leq I_{geo} < 3$                                                                                                                      | Moderately to heavily contaminated                                                                                                                                                        |                                                                     |
|                                             |                                      |                                                                                                                                                                                      | $3 \leq I_{geo} < 4$                                                                                                                      | Heavily contaminated                                                                                                                                                                      |                                                                     |
|                                             |                                      |                                                                                                                                                                                      | $4 \leq I_{geo} < 5$                                                                                                                      | Heavily to extremely contaminated                                                                                                                                                         |                                                                     |
|                                             |                                      |                                                                                                                                                                                      | $I_{geo} \geq 5$                                                                                                                          | Extremely contaminated                                                                                                                                                                    |                                                                     |
| Contamination factor ( $CF$ )               |                                      | $CF_{metals} = \frac{C_n}{B_n}$ Where, $C_n$ and $B_n$ are the measured and background elemental concentrations in sediment respectively                                             | $CF < 1$<br>$1 \leq CF < 3$<br>$3 \leq CF < 6$<br>$CF \geq 6$                                                                             | Low contamination<br>Moderate contamination<br>Considerable contamination<br>Very high contamination                                                                                      | Hakanson (1980); Kumar et al. (2022); Kumar et al. (2021)           |
| Degree of contamination ( $C_d$ )           |                                      | $C_d = \sum_{i=1}^n CF_i$ where, CF is the contamination factor                                                                                                                      | $C_d < 8$<br>$8 \leq C_d < 16$<br>$16 \leq C_d < 32$<br>$C_d \geq 32$                                                                     | Low contamination<br>Moderate contamination<br>Considerable contamination<br>Very high contamination                                                                                      | Kumar et al. (2022); Hakanson (1980)                                |
| Modified degree of contamination ( $mC_d$ ) |                                      | $mC_d = \frac{1}{n} \sum_{i=1}^n CF_i$ where, CF is the contamination factor                                                                                                         | $mC_d < 1.5$<br>$1.5 \leq mC_d < 2$<br>$2 \leq mC_d < 4$<br>$4 \leq mC_d < 8$<br>$8 \leq mC_d < 16$<br>$16 \leq mC_d < 32$<br>$mC_d > 32$ | Nil to very low contamination<br>Low contamination<br>Moderate contamination<br>High contamination<br>Very high contamination<br>Extremely high contamination<br>Ultra high contamination | Abraham and Parker (2008); Kumar et al. (2021); Kumar et al. (2022) |
| Enrichment factor ( $EF$ )                  |                                      | $EF = \frac{(C_n/Al)_{sample}}{(C_n/Al)_{background}}$ Where, $C_n$ is the measured elemental concentration in sediment and $B_n$ is the background heavy metal concentrations       | $EF = 1$<br>$1 \leq EF < 1.5$<br>$1.5 \leq EF < 3$<br>$3 \leq EF < 5$<br>$5 \leq EF < 10$<br>$EF > 10$                                    | Baseline data<br>Possible anthropogenic origin<br>Minor enrichment<br>Moderate enrichment<br>Severe modification<br>Very severe modification                                              | Tamim et al. (2016); Kumar et al. (2022); Islam et al. (2017)       |
| Pollution load index ( $PLI$ )              |                                      | $PLI = \sqrt[n]{CF_1 \times CF_2 \times \dots \times CF_n}$ where, CF is the contamination factor                                                                                    | $PLI = 0$<br>$PLI < 1$<br>$PLI > 1$                                                                                                       | Perfection<br>Baseline level<br>Contaminated                                                                                                                                              | Kumar et al. (2022); Kumar et al. (2021)                            |

|                                                 |                                                                                                  |                                                                                                                                                                                                                                                                                                                                                                                                                                                                                                                     |                                                                                                                                                                                          |                                                                                                                                                  |                                                                           |
|-------------------------------------------------|--------------------------------------------------------------------------------------------------|---------------------------------------------------------------------------------------------------------------------------------------------------------------------------------------------------------------------------------------------------------------------------------------------------------------------------------------------------------------------------------------------------------------------------------------------------------------------------------------------------------------------|------------------------------------------------------------------------------------------------------------------------------------------------------------------------------------------|--------------------------------------------------------------------------------------------------------------------------------------------------|---------------------------------------------------------------------------|
| <b>Sediment quality guideline based indices</b> | Mean ERM Quotient ( $M-ERM-Q$ )                                                                  | $M-ERM-Q = \frac{\sum_{i=1}^n \frac{C_i}{ERM_i}}{n}$ <p>where, <math>C_i</math> is the concentration of element <math>i</math>, <math>ERM_i</math> is the ERM values for the element <math>i</math> and <math>n</math> is the number of element</p>                                                                                                                                                                                                                                                                 | <p><math>M-ERM-Q &lt; 0.1</math><br/> <math>0.11 \leq M-ERM-Q &lt; 0.5</math><br/> <math>0.51 \leq M-ERM-Q &lt; 1.5</math><br/> <math>M-ERM-Q &gt; 1.5</math></p>                        | <p>9% probability of toxicity<br/> 21% probability of toxicity<br/> 49% probability of toxicity<br/> 76% probability of toxicity</p>             | <p>Long et al. (2000);<br/> Islam et al. (2017)</p>                       |
|                                                 | Toxic Unit analysis ( $TU$ )                                                                     | $TU = \frac{C_M}{PEL}$ <p>where, <math>C_M</math> is the concentration of heavy metal and <math>PEL</math> is the probable effect level.</p> $\sum TU_s = TU_{metal1} + TU_{metal2} + TU_{metal3} \dots \dots \dots + TU_{metaln}$ <p>where, <math>\sum TU_s</math> is the sum of toxic units for metals in sediments</p>                                                                                                                                                                                           | <p><math>\sum TU_s &lt; 4</math><br/> <math>4 \leq \sum TU_s \leq 6</math><br/> <math>\sum TU_s &gt; 6</math></p>                                                                        | <p>Low toxicity level<br/> Moderate toxicity level<br/> Heavy toxicity level</p>                                                                 | <p>Islam et al. (2020);<br/> Kumar et al. (2021)</p>                      |
| <b>Ecological indices</b>                       | Environmental Toxicity Quotient (ETQ)                                                            | $ETQ = \frac{\sum_{i=1}^n TS_i \times C_i / TS_{As}}{n}$ <p>where, <math>C_i</math> is the concentration of element <math>i</math>, and <math>n</math> is the number of analyzed elements. <math>TS_i</math> is the total score of each element and <math>TS_{As}</math> is the total score of arsenic published by Agency for Toxic Substances and Disease Registry (ASTDR). The ASTDR provided scores for each element are As = 1674, Pb = 1531, Cd = 1320, Co = 1013, Ni = 996, Zn = 915, Cr = 895, Cu = 807</p> | <p><math>ETQ &lt; 10</math><br/> <math>10 \leq ETQ \leq 50</math><br/> <math>50 \leq ETQ \leq 100</math><br/> <math>100 \leq ETQ \leq 300</math><br/> <math>ETQ &gt; 300</math></p>      | <p>Low toxicity level<br/> Moderate toxicity level<br/> High toxicity level<br/> Very High toxicity level<br/> Extremely High toxicity level</p> | <p>Maftei et al. (2019);<br/> Ali et al. (2018);<br/> ASTDR (2017)</p>    |
|                                                 | Potential ecological risk factor ( $Er^i$ )                                                      | $Er^i = Tr^i \times CF^i$ <p>where, <math>Tr^i</math> is the biological toxic metal response factor (Cr=2, Mn=1, Zn=1, As=10, and Sb=10; Islam et al. 2017) and <math>CF</math> is the contamination factor</p>                                                                                                                                                                                                                                                                                                     | <p><math>Er^i &lt; 40</math><br/> <math>40 \leq Er^i &lt; 80</math><br/> <math>80 \leq Er^i &lt; 160</math><br/> <math>160 \leq Er^i &lt; 320</math><br/> <math>Er^i &gt; 320</math></p> | <p>Low risk<br/> Moderate risk<br/> Considerable risk<br/> High risk<br/> Very high risk</p>                                                     | <p>Islam et al. (2017);<br/> Khan et al. (2020);<br/> Hakanson (1980)</p> |
| Potential ecological risk index ( $RI$ )        | $RI = \sum_{i=1}^n Er^i$ <p>where, <math>Er^i</math> is the potential ecological risk factor</p> | <p><math>RI &lt; 150</math><br/> <math>150 \leq RI &lt; 300</math><br/> <math>300 \leq RI &lt; 600</math><br/> <math>RI \geq 600</math></p>                                                                                                                                                                                                                                                                                                                                                                         | <p>Low risk<br/> Moderate risk<br/> Considerable risk<br/> High risk</p>                                                                                                                 | <p>Islam et al. (2020);<br/> Khan et al. (2020)</p>                                                                                              |                                                                           |

**Table S2:** Health risk assessment factors including reference values.

|                                | Unit               | Value    | Metal(oid)s | R <sub>f</sub> D <sub>dermal</sub><br>(mg.kg <sup>-1</sup> .day <sup>-1</sup> ) | SF <sub>dermal</sub><br>(mg.kg <sup>-1</sup> .day <sup>-1</sup> ) | References                            |
|--------------------------------|--------------------|----------|-------------|---------------------------------------------------------------------------------|-------------------------------------------------------------------|---------------------------------------|
| Exposure frequency (EF)        | d/yr               | 350      | Cr          | 3.00E-03                                                                        | 5.00E-01                                                          | Maftai et al. (2019)                  |
| Exposure duration (ED)         | yr                 | 30       | Mn          | 1.84E-03                                                                        |                                                                   | Kusin et al. (2018)                   |
| Body average weight (BW)       | kg                 | 70       | Co          | 2.00E-02                                                                        |                                                                   | Ferreira-Baptista & De Miguel, (2005) |
| Average day (AT)               | days               | 10950    | Zn          | 3.00E-01                                                                        |                                                                   | Kusin et al. (2018)                   |
| Skin surface area (SA)         | cm <sup>2</sup>    | 5700     | As          | 3.00E-04                                                                        | 1.50E+00                                                          | Kusin et al. (2018)                   |
| Adherence factor (AF)          | mg/cm <sup>2</sup> | 0.07     | Sb          | 8.00E-06                                                                        |                                                                   | Kusin et al. (2018)                   |
| Dermal absorption factor (ABS) | n/a                | 0.001    | Ba          | 4.90E-03                                                                        |                                                                   | Ferreira-Baptista & De Miguel, (2005) |
| Conversion factor (CF)         | kg/mg              | 1.00E-06 | U           | 5.10E-04                                                                        |                                                                   | Ferreira-Baptista & De Miguel, (2005) |

**Table S3:** Varimax rotated principal component analysis of elemental variables in Teesta River, Bangladesh. Significant values are in bold face.

| Elements | Principal Components |             |             | Sampling site | PC1         |
|----------|----------------------|-------------|-------------|---------------|-------------|
|          | PC1                  | PC2         | PC3         |               |             |
| Na       | .155                 | .088        | <b>.926</b> | T1            | <b>.975</b> |
| Al       | .677                 | -.006       | -.046       | T2            | <b>.982</b> |
| K        | <b>.941</b>          | -.044       | .271        | T3            | <b>.999</b> |
| Ti       | .617                 | .378        | -.322       | T4            | <b>.999</b> |
| Cr       | <b>.901</b>          | .350        | .103        | T5            | <b>.998</b> |
| Mn       | -.185                | .728        | -.220       | T6            | <b>.997</b> |
| Co       | <b>.964</b>          | .131        | .154        | T7            | <b>.959</b> |
| Zn       | <b>.884</b>          | .210        | .037        | T8            | <b>.993</b> |
| As       | <b>.881</b>          | .069        | -.081       | T9            | <b>.998</b> |
| Rb       | <b>.961</b>          | .026        | .222        | T10           | <b>.999</b> |
| Sb       | .723                 | -.167       | -.314       |               |             |
| Cs       | <b>.961</b>          | .018        | .180        |               |             |
| Ba       | <b>.948</b>          | .077        | .223        |               |             |
| Th       | .064                 | <b>.930</b> | .223        |               |             |
| U        | .404                 | <b>.828</b> | .182        |               |             |

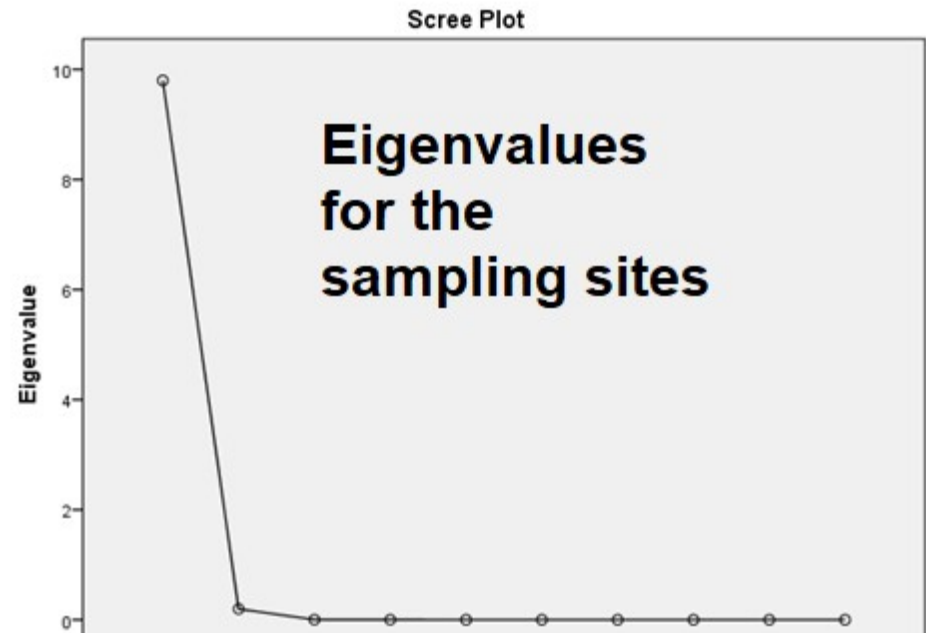

|               |        |        |        |       |
|---------------|--------|--------|--------|-------|
| Eigenvalues   | 8.52   | 2.456  | 1.44   | 9.80  |
| % of Variance | 56.801 | 16.372 | 9.597  | 98.01 |
| Cumulative %  | 56.801 | 73.173 | 82.770 | 98.01 |

**Table S4:** Correlations among the analyzed parameters for Teesta River sediment, Bangladesh.

|    | Na    | Al     | K      | Ti     | Cr     | Mn     | Co     | Zn     | As     | Rb     | Sb     | Cs     | Ba     | Th     | U |
|----|-------|--------|--------|--------|--------|--------|--------|--------|--------|--------|--------|--------|--------|--------|---|
| Na | 1     |        |        |        |        |        |        |        |        |        |        |        |        |        |   |
| Al | .109  | 1      |        |        |        |        |        |        |        |        |        |        |        |        |   |
| K  | .395* | .630** | 1      |        |        |        |        |        |        |        |        |        |        |        |   |
| Ti | -.063 | .501** | .451*  | 1      |        |        |        |        |        |        |        |        |        |        |   |
| Cr | .230  | .580** | .862** | .621** | 1      |        |        |        |        |        |        |        |        |        |   |
| Mn | -.113 | -.099  | -.180  | .076   | .072   | 1      |        |        |        |        |        |        |        |        |   |
| Co | .290  | .615** | .946** | .551** | .936** | -.093  | 1      |        |        |        |        |        |        |        |   |
| Zn | .166  | .469** | .804** | .565** | .902** | -.004  | .906** | 1      |        |        |        |        |        |        |   |
| As | .068  | .522** | .810** | .550** | .793** | -.042  | .847** | .773** | 1      |        |        |        |        |        |   |
| Rb | .356  | .641** | .984** | .534** | .895** | -.173  | .959** | .831** | .833** | 1      |        |        |        |        |   |
| Sb | -.128 | .391*  | .589** | .405*  | .511** | -.202  | .635** | .566** | .581** | .608** | 1      |        |        |        |   |
| Cs | .282  | .568** | .964** | .496** | .901** | -.186  | .961** | .868** | .837** | .976** | .629** | 1      |        |        |   |
| Ba | .321  | .597** | .950** | .508** | .915** | -.169  | .960** | .891** | .801** | .961** | .579** | .961** | 1      |        |   |
| Th | .270  | .010   | .048   | .330   | .397*  | .477** | .218   | .245   | .075   | .122   | -.118  | .114   | .185   | 1      |   |
| U  | .267  | .264   | .370*  | .472** | .654** | .354   | .515** | .499** | .384*  | .439*  | .176   | .439*  | .484** | .886** | 1 |

\*\*Correlation is significant at the 0.01 level (2-tailed).

\*Correlation is significant at the 0.05 level (2-tailed)

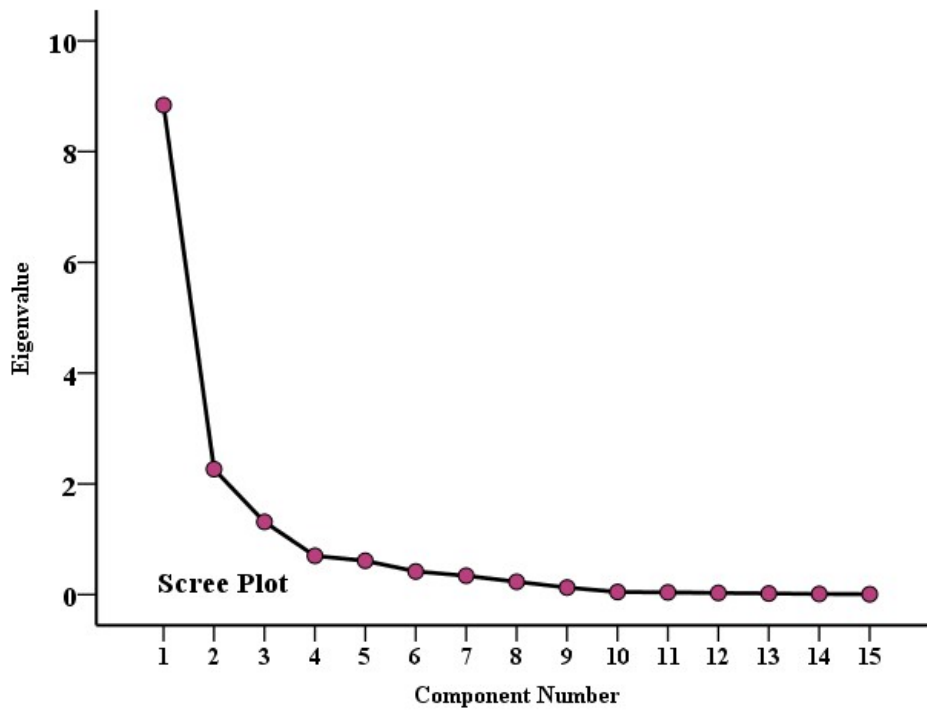

**Component Plot in Rotated Space**

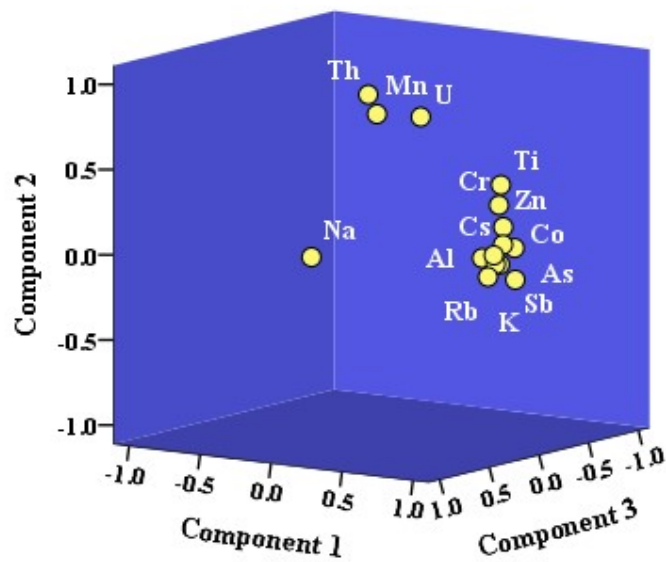

**Fig. S1:** Principal component analysis of the analyzed trace metal(oid)s by scree plot of the characteristic roots (eigenvalues) and component plot in rotated space.

## References

- Abraham, G., Parker, R., 2008. Assessment of heavy metal enrichment factors and the degree of contamination in marine sediments from Tamaki Estuary, Auckland, New Zealand. *Environ. Monit. Assess.* 136 (1–3), 227–238.
- Ali, M.M., Ali, M.L., Islam, M.S., Rahman, M.Z., 2018. Assessment of toxic metals in water and sediment of Pasur River in Bangladesh. *Water Sci Technol* 77:1418–1430. <https://doi.org/10.2166/wst.2018.016>
- ASTDR, 2017. The Priority List of Hazardous Substances; ASTDR: Atlanta, GA, USA.
- Ferreira-Baptista, L., & De Miguel, E. (2005). Geochemistry and risk assessment of street dust in Luanda, Angola: A tropical urban environment. *Atmospheric Environment*, 39(25), 4501–4512. doi:10.1016/j.atmosenv.2005.03.02
- Hakanson, L. 1980. An ecological risk index for aquatic pollution control- A sedimentological approach. *Water Res.*, 14(8): 975–1001
- Islam, A.R.M.T., Hasanuzzaman, M., Islam, H.M.T., Mia, M.U., Khan, R., Habib, M.A., Rahman, M.M., Siddique, M.A.B., Moniruzzaman, M., Rashid, M.B., 2020. Quantifying Source Apportionment, Co-occurrence, and Ecotoxicological Risk of Metals from Upstream, Lower Midstream, and Downstream River Segments, Bangladesh. *Environmental Toxicology and Chemistry*, 0:pp-1-14. <http://dx.doi.org/10.1002/etc.4814>
- Islam, M.A., Al-mamun, A., Hossain, F., Quraishi, S.B., Naher, K., Khan, R., Das, S., Tamim, U., Hossain, S.M., Nahid, F., 2017. Contamination and ecological risk assessment of trace elements in sediments of the rivers of Sundarban mangrove forest, Bangladesh. *Marine Pollution Bulletin* 124: 356–366. <http://dx.doi.org/10.1016/j.marpolbul.2017.07.059>
- Kumar, S., Islam, A.R.M.T., Hasanuzzaman, M., Salam, R., Islam, M.S., Khan, R., Rahman, M.S., Pal, S.C., Ali, M.M., Idris, A.M., Gustave, W., Elbeltagi, A., 2022. Potentially toxic elemental contamination in Wainivesi River, Fiji impacted by gold-mining activities using chemometric tools and SOM analysis. *Environmental Science and Pollution Research*, <https://doi.org/10.1007/s11356-022-18734-w>
- Kumar, S., Islam, A.R.M.T., Hasanuzzaman, M., Salam, R., Khan, R., Islam, M.S., 2021a. Preliminary assessment of heavy metals in surface water and sediment in Nakuvadra-Rakiraki River, Fiji using indexical and chemometric approaches. *Journal of Environmental Management*, 298:113517. <https://doi.org/10.1016/j.jenvman.2021.113517>
- Kumar, S., Islam, A.R.M.T., Islam, H.M.T., Hasanuzzaman, M., Ongoma, V., Khan, R., Mallick, J., 2021b. Water resources pollution associated with risks of heavy metals from Vatukoula Goldmine region, Fiji. *Journal of Environmental Management*, 293: 112868. <https://doi.org/10.1016/j.jenvman.2021.112868>
- Khan, R., Islam, M.S., Tareq, A.R.M., Naher, K., Islam, A.R.M.T., Habib, M.A., Siddique, M.A.B., Islam, M.A., Das, S., Rashid, M.B., Ullah, A.K.M.A., Miah, M.M.H., Masrura, S.U., Bodrud-Doza, M., Sarker, M.R., Badruzzaman, A.B.M., 2020. Distribution, sources and ecological risk of trace elements and polycyclic aromatic hydrocarbons in sediments from a polluted urban river in central Bangladesh. *Environ Nanotechnol Monit Manag* 14:100318. <https://doi.org/10.1016/j.enmm.2020.100318>
- Khan, R., Das, S., Kabir, S., Habib, M.A., Naher, K., Islam, M.A., Tamim, U., Rahman, A.K.M.R., Deb, A.K., Hossain, S.M., 2019. Evaluation of the elemental distribution in soil samples collected from ship-breaking areas and an adjacent island. *Journal of Environmental Chemical Engineering*, 7, <https://doi.org/10.1016/j.jece.2019.103189>.
- Kusin, F.M.; Azani, N.N.M.; Hasan, S.N.M.S.; Sulong, N.A. 2018. Distribution of heavy metals and metalloid in surface sediments of heavily-mined area for bauxite ore in Pengerang, Malaysia and associated risk assessment. *Catena* 165, 454–464, doi:10.1016/j.catena.2018.02.029.

- Long, E.R., MacDonald, D.D., Severn, C.G., Hong, B.C., 2000. Classifying probabilities of acute toxicity in marine sediments with empirically derived sediment quality guidelines. *Environ. Toxicol.* 19, 2598–2601.
- Maftai, A.E., Buzatu, A., Buzgar, N., Apopei, A.I., 2019. Spatial Distribution of Minor Elements in the Tazlău River Sediments: Source Identification and Evaluation of Ecological Risk. *Int. J. Environ. Res. Public Health*, 16:4664. <https://doi.org/10.3390/ijerph16234664>
- Müller, G., 1979. Schwermetalle in den sediments des rheins-veran-derngren seitt. 1971. *Umschan.* 79, 778–783.
- Tamim, U., Khan, R., Jolly, Y.N., Fatema, K., Das, S., Naher, K., Islam, M.A., Islam, S.M.A., Hossain, S.M., 2016. Elemental distribution of metals in urban river sediments near an industrial effluent source. *Chemospher*155, 509-518. <https://doi.org/10.1016/j.chemosphere.2016.04.099>
